# Supplementary material for: The Burden of Spinal Muscular Atrophy on Informal Caregivers
Source: PubMed Central journal article supplement (PMC7730048; doi:10.3390/ijerph17238989), 2020-12-02
Supplement: ijerph-17-08989-s001.pdf [file ijerph-17-08989-s001.pdf]

S1 Table: Mean hours (SD) of informal caregiving provided daily to patients with SMA by age.

| Activities                                       | <10 years old (n=46) |                | >10years old (n=22) |                |
|--------------------------------------------------|----------------------|----------------|---------------------|----------------|
|                                                  | Main caregiver       | All caregivers | Main caregiver      | All caregivers |
| Basic hygiene, dressing.                         | 1.11 (0.98)          | 1.65 (1.53)    | 1.37 (1.14)         | 1.86 (1.37)    |
| Feeding the patient.                             | 1.35 (1.64)          | 1.83 (2.25)    | 0.82 (0.76)         | 1.14 (1.05)    |
| Bathing or showering                             | 0.53 (0.34)          | 0.78 (0.57)    | 0.91 (0.81)         | 1.54 (1.35)    |
| Helping the patient to move.                     | 1.84 (2.28)          | 2.54 (2.82)    | 1.34 (1.53)         | 1.89 (1.78)    |
| Total BADL                                       | 4.84 (3.49)          | 6.83 (4.79)    | 4.45 (3.71)         | 6.44 (4.84)    |
| Cooking and preparing special meals.             | 0.55 (0.74)          | 0.85 (1.11)    | 0.6 (0.77)          | 0.9 (1.11)     |
| Administering drugs/minor cures.                 | 0.92 (1.16)          | 1.27 (1.61)    | 1.12 (1.18)         | 1.45 (1.31)    |
| Other IADL <sup>a</sup>                          | 0.02 (0.13)          | 0.04 (0.28)    | 0.01 (0.07)         | 0.01 (0.07)    |
| Total IADL                                       | 1.5 (1.53)           | 2.16 (2.25)    | 1.75 (1.45)         | 2.37 (1.97)    |
| Other activities directly related to the disease | 0.51 (0.98)          | 0.72 (1.15)    | 0.73 (0.91)         | 1.81 (2.1)     |
| All activities                                   | 6.86 (4.43)          | 9.72 (6.26)    | 6.94 (5.08)         | 10.64 (7.58)   |

Note: duration of informal care was censored to a maximum of 16 hours per day per caregiver. <sup>a</sup> Other IADL included the time spent on medical visits, diagnostic tests, travel, financial, administrative or legal affairs and social and leisure activities.

S2 Table: Mean hours (SD) of informal caregiving provided daily to patients with SMA by non-invasive respiratory supply system.

| Activities                                       | No (n=35)      |                | Yes (n=30)     |                |
|--------------------------------------------------|----------------|----------------|----------------|----------------|
|                                                  | Main caregiver | All caregivers | Main caregiver | All caregivers |
| Basic hygiene, dressing                          | 0.84 (0.74)    | 1.23 (1.4)     | 1.61 (1.15)    | 2.23 (1.18)    |
| Feeding the patient                              | 0.88 (0.95)    | 1.1 (1.16)     | 1.62 (1.8)     | 2.32 (2.52)    |
| Bathing or showering                             | 0.47 (0.42)    | 0.77 (0.89)    | 0.88 (0.63)    | 1.33 (0.95)    |
| Helping the patient to move                      | 1.65 (2.29)    | 2.31 (3.04)    | 1.86 (1.88)    | 2.48 (1.94)    |
| Total BADL                                       | 3.86 (3.45)    | 5.42 (4.85)    | 5.98 (3.36)    | 8.38 (4.15)    |
| Cooking and preparing special meals              | 0.42 (0.57)    | 0.61 (0.92)    | 0.79 (0.88)    | 1.24 (1.23)    |
| Administering drugs/minor cures                  | 0.85 (1.33)    | 1.05 (1.5)     | 1.12 (0.92)    | 1.57 (1.37)    |
| Other IADL <sup>a</sup>                          | 0.02 (0.15)    | 0.05 (0.33)    | 0.01 (0.06)    | 0.01 (0.06)    |
| Total IADL                                       | 1.3 (1.42)     | 1.72 (1.93)    | 1.93 (1.56)    | 2.83 (2.26)    |
| Other activities directly related to the disease | 0.54 (0.81)    | 1.02 (1.38)    | 0.66 (1.15)    | 1.18 (1.86)    |
| All activities                                   | 5.71 (4.26)    | 8.17 (6.25)    | 8.59 (4.61)    | 12.39 (6.44)   |

Note: duration of informal care was censored to a maximum of 16 hours per day per caregiver. <sup>a</sup> Other IADL included the time spent on medical visits, diagnostic tests, travel, financial, administrative or legal affairs and social and leisure activities.

S3 Table : Mean hours (SD) of informal caregiving provided daily to patients with SMA by country.

| Activities                                         | Spain          |                | United Kingdom |                | Germany        |                | France         |                | Whole sample   |                |
|----------------------------------------------------|----------------|----------------|----------------|----------------|----------------|----------------|----------------|----------------|----------------|----------------|
|                                                    | Main caregiver | All caregivers | Main caregiver | All caregivers | Main caregiver | All caregivers | Main caregiver | All caregivers | Main caregiver | All caregivers |
| -Basic hygiene, dressing.                          | 1.10 (1.21)    | 1.57 (1.7)     | 1.07 (0.71)    | 1.70 (1.13)    | 1.21 (0.86)    | 1.73 (1.04)    | 1.44 (1.11)    | 2.01 (1.68)    | 1.20 (1.04)    | 1.73 (1.48)    |
| -Feeding the patient.                              | 0.91 (0.94)    | 1.15 (1.22)    | 2.50 (2.73)    | 3.55 (3.69)    | 0.86 (0.69)    | 1.24 (0.83)    | 1.02 (0.86)    | 1.40 (1.34)    | 1.18 (1.43)    | 1.61 (1.97)    |
| -Bathing or showering                              | 0.54 (0.51)    | 0.85 (0.83)    | 0.53 (0.25)    | 0.96 (0.65)    | 0.83 (0.53)    | 1.15 (0.76)    | 0.78 (0.77)    | 1.28 (1.42)    | 0.66 (0.56)    | 1.03 (0.96)    |
| -Helping the patient to move.                      | 1.59 (2.17)    | 2.22 (4.48)    | 1.80 (2.31)    | 2.32 (2.23)    | 1.93 (1.77)    | 2.66 (2.19)    | 1.53 (2.17)    | 2.27 (2.90)    | 1.68 (2.08)    | 2.34 (2.54)    |
| -Total BADL                                        | 4.15 (3.35)    | 5.79 (4.48)    | 5.89 (4.37)    | 8.52 (5.56)    | 4.84 (3.41)    | 6.77 (3.68)    | 4.76 (3.49)    | 6.95 (5.57)    | 4.72 (3.54)    | 6.71 (4.78)    |
| -Cooking and preparing special meals.              | 0.55 (0.77)    | 0.89 (1.26)    | 0.61 (0.90)    | 0.82 (1.06)    | 0.89 (0.56)    | 1.36 (0.63)    | 0.31 (0.70)    | 0.44 (1.09)    | 0.57 (0.75)    | 0.87 (1.10)    |
| -Administering drugs/minor cures.                  | 1.10 (1.31)    | 1.35 (1.54)    | 1.39 (1.46)    | 1.95 (1.92)    | 0.77 (0.76)    | 1.13 (0.93)    | 0.73 (0.97)    | 1.06 (1.61)    | 0.99 (1.17)    | 1.33 (1.52)    |
| -Other IADL <sup>a</sup>                           | 0.03 (0.18)    | 0.07 (0.38)    | 0.00 (0.01)    | 0.00 (0.01)    | 0.02 (0.09)    | 0.02 (0.09)    | 0.00 (0.00)    | 0.00 (0.00)    | 0.02 (0.12)    | 0.03 (0.24)    |
| -Total IADL                                        | 1.69 (1.64)    | 2.32 (2.33)    | 2.00 (1.67)    | 2.77 (2.22)    | 1.68 (1.13)    | 2.51 (1.43)    | 1.05 (1.42)    | 1.49 (2.34)    | 1.59 (1.50)    | 2.24 (2.16)    |
| -Other activities directly related to the disease. | 0.69 (1.17)    | 0.99 (1.40)    | 0.52 (1.02)    | 1.21 (1.87)    | 0.70 (0.47)    | 1.38 (1.24)    | 0.38 (0.89)    | 0.88 (2.03)    | 0.59 (0.96)    | 1.08 (1.59)    |
| -All activities                                    | 6.52 (4.74)    | 9.10 (6.41)    | 8.42 (4.67)    | 12.50 (5.96)   | 7.21 (4.17)    | 10.65 (5.45)   | 6.18 (4.91)    | 9.32 (8.44)    | 6.89 (4.62)    | 10.02 (6.68)   |

Note: time of informal care was censored to a maximum of 16 hours per day per caregiver. <sup>a</sup> Other IADL included the time spent on medical visits, diagnostic tests, travelling, financial, administrative or legal affairs and social and leisure activities.

Table S4: Analysis of burden of care according to Zarit Burden Interview results

|          | Beta Coef.<br>(Standard Error) | p-value |
|----------|--------------------------------|---------|
| Type 1   | 2.73 (9.48)                    | 0.78    |
| Type 2   | 10.30 (6.32)                   | 0.111   |
| n        |                                | 52      |
| F        |                                | 3.47    |
| R square |                                | 0.41    |

Note: regression models included as control variables sex, age, country, marital and job status of caregivers and whether the patient with SMA was receiving social services due to the illness. a These values represent the beta coefficients obtained with ordinary least squares regression (OLS) robust of heteroscedasticity.
